# Supplementary material for: Theoretical-computational modeling of charge transfer and intersystem crossing reactions in complex chemical systems
Source: Royal Society of Chemistry journal article supplement (doi:10.1039/c8ra03900c), 2018-01-01

# Theoretical-computational modeling of charge transfer and intersystem crossing re actions in complex chemical systems

Andrea Amadei <sup>1</sup> and Massimiliano Aschi <sup>2</sup>

<sup>1</sup> Dipartimento di Scienze e Tecnologie Chimiche Università di Roma Tor Vergata - Italy

<sup>2</sup> Dipartimento di Scienze Fisiche e Chimiche Università di L'Aquila - Italy

## Supplementary Information

Contents:

S1. MD Topologies in Gromacs format for DMN

S2. MD Coordinates of DMN in Gromos format

S3. DMN Optimized geometries for the ground and the first three excited (singlet) states

S4. MD Topologies in Gromacs format for singlet FL

S5. MD Coordinates of singlet FL in Gromos format

S6. Spectrum of the eigenvalues as obtained from the diagonalization of the all-atom covariance matrix for singlet FL.

S7. Singlet FL Optimized geometries as obtained from the essential plane

### S1. Gromacs-format Topology of DMN in the S3 electronic state utilized in the NonEqMD (see text)

[ moleculetype ]

; Name nrexcl

```
dmn 3
1_2 NBB 1 2.065 2.317 2.871
1_2 CAY 2 2.142 2.290 2.792
1_2 CAV 3 2.235 2.266 2.685
1_2 CAX 4 2.321 2.379 2.666
1_2 NBC 5 2.401 2.459 2.682
1_2 CAT 6 2.213 2.179 2.588
1_2 CAB 7 2.091 2.161 2.524
1_2 CAA 8 2.071 2.014 2.559
1_2 CAF 9 2.212 1.958 2.547
1_2 CAE 10 2.290 2.086 2.519
1_2 CAD 11 2.279 2.147 2.381
1_2 CAC 12 2.140 2.207 2.388
1_2 CAJ 13 2.083 2.189 2.248
1_2 CAS 14 2.132 2.051 2.208
1_2 CAG 15 2.276 2.085 2.242
1_2 CAH 16 2.282 2.197 2.159
1_2 CAI 17 2.166 2.262 2.163
1_2 CAK 18 2.128 2.352 2.072
```

|     |     |    |       |       |       |
|-----|-----|----|-------|-------|-------|
| 1_2 | OAU | 19 | 2.059 | 2.451 | 2.134 |
| 1_2 | CAZ | 20 | 1.926 | 2.472 | 2.088 |
| 1_2 | CAL | 21 | 2.220 | 2.385 | 1.973 |
| 1_2 | CAO | 22 | 2.166 | 2.453 | 1.865 |
| 1_2 | HAO | 23 | 2.072 | 2.507 | 1.873 |
| 1_2 | CAP | 24 | 2.240 | 2.450 | 1.748 |
| 1_2 | HAP | 25 | 2.233 | 2.535 | 1.679 |
| 1_2 | CAQ | 26 | 2.359 | 2.380 | 1.732 |
| 1_2 | HAQ | 27 | 2.379 | 2.325 | 1.640 |
| 1_2 | CAR | 28 | 2.410 | 2.326 | 1.850 |
| 1_2 | HAR | 29 | 2.504 | 2.272 | 1.836 |
| 1_2 | CAM | 30 | 2.345 | 2.323 | 1.972 |
| 1_2 | CAN | 31 | 2.374 | 2.228 | 2.069 |
| 1_2 | OAW | 32 | 2.499 | 2.202 | 2.117 |
| 1_2 | CBA | 33 | 2.629 | 2.199 | 2.059 |

[ atoms ]

```

; nr  type resnr resid atom  cgnr  charge  mass
  1   N   1  _2  NBB   1 -0.506302 14.0067
  2   C   1  _2  CAY   1  0.491696 12.0110
  3   C   1  _2  CAV   1 -0.398920 12.0110
  4   C   1  _2  CAX   2  0.495441 12.0110
  5   N   1  _2  NBC   2 -0.508099 14.0067
  6   C   1  _2  CAT   2  0.293006 12.0110
  7  CH2  1  _2  CAB   2 -0.064972 13.0190
  8  CH1  1  _2  CAA   2  0.020227 14.0270
  9  CH1  1  _2  CAF   2  0.032816 14.0270
 10  CH2  1  _2  CAE   2 -0.102442 13.0190
 11  CH1  1  _2  CAD   3  0.044276 13.0190
 12  CH1  1  _2  CAC   3 -0.004646 13.0190
 13  CH2  1  _2  CAJ   3  0.280741 13.0190
 14  CH1  1  _2  CAS   4 -0.148762 14.0270
 15  CH2  1  _2  CAG   4  0.229046 13.0190
 16   C   1  _2  CAH   4 -0.061371 12.0110
 17   C   1  _2  CAI   4 -0.200545 12.0110
 18   C   1  _2  CAK   4  0.195138 12.0110
 19  OA   1  _2  OAU   4 -0.355760 15.9994
 20  CH3  1  _2  CAZ   4  0.262069 15.0350
 21   C   1  _2  CAL   5  0.029026 12.0110
 22  CR1  1  _2  CAO   5 -0.107860 12.0110
 23  HC   1  _2  HAO   5  0.084225  1.0080
 24  CR1  1  _2  CAP   5 -0.109683 12.0110
 25  HC   1  _2  HAP   5  0.075817  1.0080
 26  CR1  1  _2  CAQ   6 -0.092679 12.0110
 27  HC   1  _2  HAQ   6  0.076830  1.0080
 28  CR1  1  _2  CAR   6 -0.117333 12.0110
 29  HC   1  _2  HAR   6  0.083461  1.0080
 30   C   1  _2  CAM   6  0.017430 12.0110
 31   C   1  _2  CAN   6  0.102043 12.0110
 32  OA   1  _2  OAW   6 -0.272116 15.9994
 33  CH3  1  _2  CBA   6  0.238203 15.0350

```

[ bonds ]

```

; ai aj fu c0, c1, ...
 2  1  2  0.114 4560970.4
 3  2  2  0.143 3724162.7
 3  4  2  0.143 3724162.7
 6  3  2  0.133 11800000.0
 4  5  2  0.114 4560970.4
 7  6  2  0.139 8660000.0
10  6  2  0.139 8660000.0
 7  8  2  0.152 5430000.0
 7 12  2  0.152 5430000.0
 8  9  2  0.152 5430000.0
10  9  2  0.152 5430000.0
10 11  2  0.152 5430000.0
11 12  2  0.152 5430000.0
11 15  2  0.152 5430000.0
12 13  2  0.152 5430000.0
13 14  2  0.152 5430000.0
13 17  2  0.139 8660000.0
15 14  2  0.152 5430000.0
15 16  2  0.139 8660000.0
16 17  2  0.133 11800000.0
16 31  2  0.133 11800000.0
17 18  2  0.133 11800000.0
18 19  2  0.136 10200000.0
18 21  2  0.139 10800000.0
19 20  2  0.143 8180000.0
21 22  2  0.139 10800000.0
21 30  2  0.139 10800000.0
22 23  2  0.109 12300000.0
22 24  2  0.139 10800000.0
24 25  2  0.109 12300000.0
24 26  2  0.139 10800000.0
26 27  2  0.109 12300000.0
26 28  2  0.139 10800000.0
28 29  2  0.109 12300000.0
30 28  2  0.139 10800000.0
30 31  2  0.139 10800000.0
31 32  2  0.136 10200000.0
32 33  2  0.143 8180000.0

```

[ pairs ]

```

; ai aj fu c0, c1, ...
 1  4  1           ; NBB CAX
 1  6  1           ; NBB CAT
 2  5  1           ; CAY NBC
 2  7  1           ; CAY CAB
 2 10  1           ; CAY CAE
 3  8  1           ; CAV CAA
 3  9  1           ; CAV CAF
 3 11  1           ; CAV CAD
 3 12  1           ; CAV CAC
 4  7  1           ; CAX CAB

```

|         |           |
|---------|-----------|
| 4 10 1  | ; CAX CAE |
| 5 6 1   | ; NBC CAT |
| 6 13 1  | ; CAT CAJ |
| 6 15 1  | ; CAT CAG |
| 7 14 1  | ; CAB CAS |
| 7 15 1  | ; CAB CAG |
| 7 17 1  | ; CAB CAI |
| 8 11 1  | ; CAA CAD |
| 8 13 1  | ; CAA CAJ |
| 9 12 1  | ; CAF CAC |
| 9 15 1  | ; CAF CAG |
| 10 13 1 | ; CAE CAJ |
| 10 14 1 | ; CAE CAS |
| 10 16 1 | ; CAE CAH |
| 11 17 1 | ; CAD CAI |
| 11 31 1 | ; CAD CAN |
| 12 16 1 | ; CAC CAH |
| 12 18 1 | ; CAC CAK |
| 13 19 1 | ; CAJ OAU |
| 13 21 1 | ; CAJ CAL |
| 13 31 1 | ; CAJ CAN |
| 14 18 1 | ; CAS CAK |
| 14 31 1 | ; CAS CAN |
| 15 18 1 | ; CAG CAK |
| 15 30 1 | ; CAG CAM |
| 15 32 1 | ; CAG OAW |
| 16 19 1 | ; CAH OAU |
| 16 21 1 | ; CAH CAL |
| 16 28 1 | ; CAH CAR |
| 16 33 1 | ; CAH CBA |
| 17 20 1 | ; CAI CAZ |
| 17 22 1 | ; CAI CAO |
| 17 30 1 | ; CAI CAM |
| 17 32 1 | ; CAI OAW |
| 18 23 1 | ; CAK HAO |
| 18 24 1 | ; CAK CAP |
| 18 28 1 | ; CAK CAR |
| 18 31 1 | ; CAK CAN |
| 19 22 1 | ; OAU CAO |
| 19 30 1 | ; OAU CAM |
| 20 21 1 | ; CAZ CAL |
| 21 25 1 | ; CAL HAP |
| 21 26 1 | ; CAL CAQ |
| 21 29 1 | ; CAL HAR |
| 21 32 1 | ; CAL OAW |
| 22 27 1 | ; CAO HAQ |
| 22 28 1 | ; CAO CAR |
| 22 31 1 | ; CAO CAN |
| 23 25 1 | ; HAO HAP |
| 23 26 1 | ; HAO CAQ |
| 23 30 1 | ; HAO CAM |
| 24 29 1 | ; CAP HAR |

|    |    |   |  |  |           |
|----|----|---|--|--|-----------|
| 24 | 30 | 1 |  |  | ; CAP CAM |
| 25 | 27 | 1 |  |  | ; HAP HAQ |
| 25 | 28 | 1 |  |  | ; HAP CAR |
| 26 | 31 | 1 |  |  | ; CAQ CAN |
| 27 | 29 | 1 |  |  | ; HAQ HAR |
| 27 | 30 | 1 |  |  | ; HAQ CAM |
| 28 | 32 | 1 |  |  | ; CAR OAW |
| 29 | 31 | 1 |  |  | ; HAR CAN |
| 30 | 33 | 1 |  |  | ; CAM CBA |

[ angles ]

| ; ai | aj | ak | fu | c0,   | c1, ... |
|------|----|----|----|-------|---------|
| 1    | 2  | 3  | 2  | 180.0 | 4000.4  |
| 2    | 3  | 4  | 2  | 115.0 | 610.0   |
| 2    | 3  | 6  | 2  | 115.0 | 610.0   |
| 4    | 3  | 6  | 2  | 115.0 | 610.0   |
| 3    | 4  | 5  | 2  | 180.0 | 4000.4  |
| 3    | 6  | 7  | 2  | 120.0 | 560.0   |
| 3    | 6  | 10 | 2  | 120.0 | 560.0   |
| 7    | 6  | 10 | 2  | 108.0 | 465.0   |
| 6    | 7  | 8  | 2  | 104.0 | 444.4   |
| 6    | 7  | 12 | 2  | 104.0 | 444.4   |
| 8    | 7  | 12 | 2  | 109.5 | 520.0   |
| 7    | 8  | 9  | 2  | 104.0 | 444.4   |
| 8    | 9  | 10 | 2  | 104.0 | 444.4   |
| 6    | 10 | 9  | 2  | 104.0 | 444.4   |
| 6    | 10 | 11 | 2  | 104.0 | 444.4   |
| 9    | 10 | 11 | 2  | 109.5 | 520.0   |
| 10   | 11 | 12 | 2  | 104.0 | 444.4   |
| 10   | 11 | 15 | 2  | 109.5 | 520.0   |
| 12   | 11 | 15 | 2  | 104.0 | 444.4   |
| 7    | 12 | 11 | 2  | 104.0 | 444.4   |
| 7    | 12 | 13 | 2  | 109.5 | 520.0   |
| 11   | 12 | 13 | 2  | 104.0 | 444.4   |
| 12   | 13 | 14 | 2  | 104.0 | 444.4   |
| 12   | 13 | 17 | 2  | 109.5 | 520.0   |
| 14   | 13 | 17 | 2  | 104.0 | 444.4   |
| 13   | 14 | 15 | 2  | 104.0 | 444.4   |
| 11   | 15 | 14 | 2  | 104.0 | 444.4   |
| 11   | 15 | 16 | 2  | 109.5 | 520.0   |
| 14   | 15 | 16 | 2  | 104.0 | 444.4   |
| 15   | 16 | 17 | 2  | 108.0 | 465.0   |
| 15   | 16 | 31 | 2  | 132.0 | 760.0   |
| 17   | 16 | 31 | 2  | 120.0 | 560.0   |
| 13   | 17 | 16 | 2  | 108.0 | 465.0   |
| 13   | 17 | 18 | 2  | 132.0 | 760.0   |
| 16   | 17 | 18 | 2  | 120.0 | 560.0   |
| 17   | 18 | 19 | 2  | 115.0 | 610.0   |
| 17   | 18 | 21 | 2  | 120.0 | 560.0   |
| 19   | 18 | 21 | 2  | 115.0 | 610.0   |
| 18   | 19 | 20 | 2  | 109.5 | 380.0   |
| 18   | 21 | 22 | 2  | 120.0 | 560.0   |

|    |    |    |   |       |       |
|----|----|----|---|-------|-------|
| 18 | 21 | 30 | 2 | 120.0 | 560.0 |
| 22 | 21 | 30 | 2 | 120.0 | 560.0 |
| 21 | 22 | 23 | 2 | 120.0 | 505.0 |
| 21 | 22 | 24 | 2 | 120.0 | 505.0 |
| 23 | 22 | 24 | 2 | 120.0 | 505.0 |
| 22 | 24 | 25 | 2 | 120.0 | 505.0 |
| 22 | 24 | 26 | 2 | 120.0 | 505.0 |
| 25 | 24 | 26 | 2 | 120.0 | 505.0 |
| 24 | 26 | 27 | 2 | 120.0 | 505.0 |
| 24 | 26 | 28 | 2 | 120.0 | 505.0 |
| 27 | 26 | 28 | 2 | 120.0 | 505.0 |
| 26 | 28 | 29 | 2 | 120.0 | 505.0 |
| 26 | 28 | 30 | 2 | 120.0 | 505.0 |
| 29 | 28 | 30 | 2 | 120.0 | 505.0 |
| 21 | 30 | 28 | 2 | 120.0 | 560.0 |
| 21 | 30 | 31 | 2 | 120.0 | 560.0 |
| 28 | 30 | 31 | 2 | 120.0 | 560.0 |
| 16 | 31 | 30 | 2 | 120.0 | 560.0 |
| 16 | 31 | 32 | 2 | 115.0 | 610.0 |
| 30 | 31 | 32 | 2 | 115.0 | 610.0 |
| 31 | 32 | 33 | 2 | 109.5 | 380.0 |

[ dihedrals ]

| ; ai aj ak al fu c0, c1, m, ... |    |    |    |   |            |
|---------------------------------|----|----|----|---|------------|
| 3                               | 6  | 4  | 2  | 2 | 0.0 167.4  |
| 6                               | 10 | 7  | 3  | 2 | 0.0 167.4  |
| 7                               | 6  | 8  | 12 | 2 | 35.3 334.8 |
| 10                              | 11 | 9  | 6  | 2 | 35.3 334.8 |
| 11                              | 10 | 12 | 15 | 2 | 35.3 334.8 |
| 12                              | 13 | 11 | 7  | 2 | 35.3 334.8 |
| 13                              | 12 | 14 | 17 | 2 | 35.3 334.8 |
| 15                              | 16 | 14 | 11 | 2 | 35.3 334.8 |
| 16                              | 15 | 31 | 17 | 2 | 0.0 167.4  |
| 17                              | 13 | 18 | 16 | 2 | 0.0 167.4  |
| 18                              | 17 | 19 | 21 | 2 | 0.0 167.4  |
| 21                              | 30 | 22 | 18 | 2 | 0.0 167.4  |
| 22                              | 21 | 24 | 23 | 2 | 0.0 167.4  |
| 24                              | 22 | 26 | 25 | 2 | 0.0 167.4  |
| 26                              | 24 | 28 | 27 | 2 | 0.0 167.4  |
| 28                              | 26 | 30 | 29 | 2 | 0.0 167.4  |
| 30                              | 31 | 28 | 21 | 2 | 0.0 167.4  |
| 31                              | 16 | 32 | 30 | 2 | 0.0 167.4  |
| 21                              | 22 | 24 | 26 | 2 | 0.0 209.3  |
| 22                              | 24 | 26 | 28 | 2 | 0.0 209.3  |
| 24                              | 26 | 28 | 30 | 2 | 0.0 209.3  |
| 26                              | 28 | 30 | 21 | 2 | 0.0 209.3  |
| 28                              | 30 | 21 | 22 | 2 | 0.0 209.3  |
| 30                              | 21 | 22 | 24 | 2 | 0.0 209.3  |
| 16                              | 17 | 18 | 21 | 2 | 0.0 209.3  |
| 17                              | 18 | 21 | 30 | 2 | 0.0 209.3  |
| 18                              | 21 | 30 | 31 | 2 | 0.0 209.3  |
| 21                              | 30 | 31 | 16 | 2 | 0.0 209.3  |

|    |    |    |    |   |       |        |
|----|----|----|----|---|-------|--------|
| 30 | 31 | 16 | 17 | 2 | 0.0   | 209.3  |
| 31 | 16 | 17 | 18 | 2 | 0.0   | 209.3  |
| 10 | 6  | 3  | 2  | 1 | 180.0 | 5.9 2  |
| 12 | 7  | 6  | 3  | 1 | 0.0   | 1.0 6  |
| 11 | 10 | 6  | 3  | 1 | 0.0   | 1.0 6  |
| 9  | 8  | 7  | 6  | 1 | 0.0   | 5.9 3  |
| 13 | 12 | 7  | 6  | 1 | 0.0   | 5.9 3  |
| 10 | 9  | 8  | 7  | 1 | 0.0   | 5.9 3  |
| 11 | 10 | 9  | 8  | 1 | 0.0   | 5.9 3  |
| 15 | 11 | 10 | 6  | 1 | 0.0   | 5.9 3  |
| 13 | 12 | 11 | 10 | 1 | 0.0   | 5.9 3  |
| 16 | 15 | 11 | 10 | 1 | 0.0   | 5.9 3  |
| 17 | 13 | 12 | 7  | 1 | 0.0   | 5.9 3  |
| 15 | 14 | 13 | 12 | 1 | 0.0   | 5.9 3  |
| 12 | 13 | 17 | 18 | 1 | 0.0   | 1.0 6  |
| 16 | 15 | 14 | 13 | 1 | 0.0   | 5.9 3  |
| 11 | 15 | 16 | 31 | 1 | 0.0   | 1.0 6  |
| 17 | 18 | 19 | 20 | 1 | 180.0 | 16.7 2 |
| 16 | 31 | 32 | 33 | 1 | 180.0 | 16.7 2 |

## S2. DMN coordinates (gromos-format)

|     |     |    |       |       |       |
|-----|-----|----|-------|-------|-------|
| 1_2 | NBB | 1  | 2.065 | 2.317 | 2.871 |
| 1_2 | CAY | 2  | 2.142 | 2.290 | 2.792 |
| 1_2 | CAV | 3  | 2.235 | 2.266 | 2.685 |
| 1_2 | CAX | 4  | 2.321 | 2.379 | 2.666 |
| 1_2 | NBC | 5  | 2.401 | 2.459 | 2.682 |
| 1_2 | CAT | 6  | 2.213 | 2.179 | 2.588 |
| 1_2 | CAB | 7  | 2.091 | 2.161 | 2.524 |
| 1_2 | CAA | 8  | 2.071 | 2.014 | 2.559 |
| 1_2 | CAF | 9  | 2.212 | 1.958 | 2.547 |
| 1_2 | CAE | 10 | 2.290 | 2.086 | 2.519 |
| 1_2 | CAD | 11 | 2.279 | 2.147 | 2.381 |
| 1_2 | CAC | 12 | 2.140 | 2.207 | 2.388 |
| 1_2 | CAJ | 13 | 2.083 | 2.189 | 2.248 |
| 1_2 | CAS | 14 | 2.132 | 2.051 | 2.208 |
| 1_2 | CAG | 15 | 2.276 | 2.085 | 2.242 |
| 1_2 | CAH | 16 | 2.282 | 2.197 | 2.159 |
| 1_2 | CAI | 17 | 2.166 | 2.262 | 2.163 |
| 1_2 | CAK | 18 | 2.128 | 2.352 | 2.072 |
| 1_2 | OAU | 19 | 2.059 | 2.451 | 2.134 |
| 1_2 | CAZ | 20 | 1.926 | 2.472 | 2.088 |
| 1_2 | CAL | 21 | 2.220 | 2.385 | 1.973 |
| 1_2 | CAO | 22 | 2.166 | 2.453 | 1.865 |
| 1_2 | HAO | 23 | 2.072 | 2.507 | 1.873 |
| 1_2 | CAP | 24 | 2.240 | 2.450 | 1.748 |
| 1_2 | HAP | 25 | 2.233 | 2.535 | 1.679 |
| 1_2 | CAQ | 26 | 2.359 | 2.380 | 1.732 |
| 1_2 | HAQ | 27 | 2.379 | 2.325 | 1.640 |
| 1_2 | CAR | 28 | 2.410 | 2.326 | 1.850 |
| 1_2 | HAR | 29 | 2.504 | 2.272 | 1.836 |
| 1_2 | CAM | 30 | 2.345 | 2.323 | 1.972 |

|     |     |    |       |       |       |
|-----|-----|----|-------|-------|-------|
| 1_2 | CAN | 31 | 2.374 | 2.228 | 2.069 |
| 1_2 | OAW | 32 | 2.499 | 2.202 | 2.117 |
| 1_2 | CBA | 33 | 2.629 | 2.199 | 2.059 |

### S3. DMN geometries Optimized at the B3LYP/6-311G\*\* level

S0

|   |          |          |          |
|---|----------|----------|----------|
| c | 3.35352  | -0.0597  | 0.19227  |
| c | 2.76038  | -1.01972 | -0.81536 |
| c | 3.32233  | -0.38833 | -2.11889 |
| c | 3.34282  | 1.14945  | -1.80375 |
| c | 2.78691  | 1.23197  | -0.35499 |
| c | 1.27143  | 0.85954  | -0.22927 |
| c | 1.25325  | -0.69198 | -0.54675 |
| c | 0.17685  | 1.42813  | -1.19313 |
| c | -1.15137 | 0.9074   | -0.62023 |
| c | -1.1481  | -0.50277 | -0.91202 |
| c | 0.14725  | -0.80911 | -1.6474  |
| c | 0.27634  | 0.51349  | -2.44176 |
| c | -2.16602 | -1.33546 | -0.53712 |
| c | -3.29984 | -0.78442 | 0.14431  |
| c | -3.3116  | 0.61093  | 0.46706  |
| c | -2.20323 | 1.45577  | 0.08506  |
| c | -4.43806 | 1.14196  | 1.14808  |
| c | -5.50782 | 0.33712  | 1.4884   |
| c | -5.50243 | -1.03493 | 1.15266  |
| c | -4.42092 | -1.58171 | 0.49187  |
| c | -1.6029  | -3.54547 | 0.12708  |
| c | -1.49414 | 3.78587  | 0.04015  |
| c | 4.13064  | -0.28875 | 1.27734  |
| c | 4.54368  | -1.61856 | 1.63305  |
| c | 4.57266  | 0.78898  | 2.11917  |
| h | -4.41701 | -2.62931 | 0.21166  |
| h | -6.35332 | -1.65928 | 1.40968  |
| h | -6.36006 | 0.76359  | 2.00938  |
| h | -4.44569 | 2.19668  | 1.39454  |
| h | 0.143    | -1.7421  | -2.21299 |
| h | 0.24953  | 2.49652  | -1.3818  |
| h | 1.19472  | 0.62241  | -3.01098 |
| h | -0.56962 | 0.66195  | -3.11904 |
| h | 0.95102  | -1.27368 | 0.32852  |
| h | 0.97734  | 1.05962  | 0.80507  |
| h | 3.06227  | 2.14365  | 0.1776   |
| h | 4.36718  | 1.53382  | -1.81994 |
| h | 2.76536  | 1.75347  | -2.50674 |
| h | 2.72958  | -0.65364 | -2.9966  |
| h | 4.33626  | -0.76065 | -2.29382 |
| h | 3.01182  | -2.07339 | -0.68515 |
| h | -1.73647 | -4.56485 | -0.24082 |
| h | -0.53306 | -3.34982 | 0.27289  |
| h | -2.1223  | -3.43004 | 1.08616  |



|   |          |          |          |
|---|----------|----------|----------|
| h | -1.89503 | 4.70796  | 0.46449  |
| h | -0.46725 | 3.64761  | 0.3965   |
| h | -1.50445 | 3.85796  | -1.05357 |
| o | -2.15467 | -2.67935 | -0.87102 |
| o | -2.35417 | 2.75282  | 0.49781  |
| n | 4.86908  | -2.70147 | 1.90728  |
| n | 4.92196  | 1.67371  | 2.78927  |

S1 (TD-B3LYP/6-311G\*\*)

|   |           |           |           |
|---|-----------|-----------|-----------|
| c | -3.586008 | -0.000021 | -0.191959 |
| c | -2.960704 | -1.136753 | 0.628777  |
| c | -3.483617 | -0.785600 | 2.046449  |
| c | -3.483496 | 0.786855  | 2.046052  |
| c | -2.960712 | 1.137206  | 0.628110  |
| c | -1.443263 | 0.792136  | 0.438154  |
| c | -1.443197 | -0.791657 | 0.438720  |
| c | -0.326328 | 1.141714  | 1.478728  |
| c | 0.987798  | 0.702503  | 0.809890  |
| c | 0.987701  | -0.701480 | 0.810324  |
| c | -0.326199 | -1.140331 | 1.479595  |
| c | -0.425887 | 0.001081  | 2.530528  |
| c | 2.057477  | -1.420169 | 0.251873  |
| c | 3.227086  | -0.711628 | -0.214525 |
| c | 3.227236  | 0.710784  | -0.215213 |
| c | 2.057749  | 1.420291  | 0.250653  |
| c | 4.354853  | 1.397450  | -0.697707 |
| c | 5.465084  | 0.698313  | -1.156755 |
| c | 5.464917  | -0.700648 | -1.156110 |
| c | 4.354516  | -1.399050 | -0.696448 |
| c | 1.001284  | -3.687049 | 0.221857  |
| c | 1.003571  | 3.688141  | 0.221885  |
| c | -3.653768 | -0.000357 | -1.619537 |
| c | -3.680434 | -1.211790 | -2.334992 |
| c | -3.679677 | 1.210697  | -2.335636 |
| h | 4.340895  | -2.479079 | -0.703694 |
| h | 6.328057  | -1.243509 | -1.518837 |
| h | 6.328341  | 1.240648  | -1.519985 |
| h | 4.341671  | 2.477468  | -0.705950 |
| h | -0.345861 | -2.149047 | 1.881660  |
| h | -0.346346 | 2.150642  | 1.880169  |
| h | -1.350806 | 0.001250  | 3.090771  |
| h | 0.417686  | 0.001457  | 3.227682  |
| h | -1.158422 | -1.177563 | -0.545417 |
| h | -1.158477 | 1.177413  | -0.546212 |
| h | -3.203945 | 2.151357  | 0.307873  |
| h | -4.504755 | 1.163612  | 2.146721  |
| h | -2.896921 | 1.230625  | 2.856571  |
| h | -2.897222 | -1.229066 | 2.857273  |
| h | -4.504951 | -1.162146 | 2.147139  |
| h | -3.203821 | -2.151120 | 0.309110  |
| h | 1.321703  | -4.565296 | -0.331943 |

|   |           |           |           |
|---|-----------|-----------|-----------|
| h | 0.833982  | -3.940513 | 1.267545  |
| h | 0.110189  | -3.255835 | -0.229087 |
| h | 1.325606  | 4.567911  | -0.328480 |
| h | 0.111882  | 3.259942  | -0.230948 |
| h | 0.836091  | 3.937990  | 1.268348  |
| o | 2.138555  | -2.758468 | 0.114731  |
| o | 2.139336  | 2.758306  | 0.111313  |
| n | -3.669566 | -2.256989 | -2.882615 |
| n | -3.668090 | 2.255608  | -2.883804 |

S2 (TD-B3LYP/6-311G\*\*)

|   |           |           |           |
|---|-----------|-----------|-----------|
| c | -3.191387 | -0.042664 | -0.596440 |
| c | -2.612460 | -1.131156 | 0.326589  |
| c | -3.209790 | -0.709290 | 1.707275  |
| c | -3.219693 | 0.859918  | 1.625759  |
| c | -2.627801 | 1.143615  | 0.208086  |
| c | -1.115470 | 0.801406  | 0.103388  |
| c | -1.104323 | -0.782077 | 0.186285  |
| c | -0.066174 | 1.225038  | 1.194153  |
| c | 1.271766  | 0.799531  | 0.615463  |
| c | 1.272163  | -0.683315 | 0.700539  |
| c | -0.048847 | -1.072755 | 1.315696  |
| c | -0.205725 | 0.129206  | 2.294594  |
| c | 2.339082  | -1.432123 | 0.285416  |
| c | 3.492535  | -0.756726 | -0.205838 |
| c | 3.497366  | 0.710647  | -0.308712 |
| c | 2.352633  | 1.469391  | 0.090108  |
| c | 4.655668  | 1.355299  | -0.812048 |
| c | 5.752589  | 0.623571  | -1.186632 |
| c | 5.750959  | -0.812762 | -1.074198 |
| c | 4.649385  | -1.474659 | -0.596527 |
| c | 1.465230  | -3.615613 | -0.407297 |
| c | 1.360817  | 3.738644  | -0.116747 |
| c | -4.541673 | -0.075250 | -1.072536 |
| c | -5.198647 | -1.302292 | -1.276472 |
| c | -5.215057 | 1.117199  | -1.393960 |
| h | 4.632919  | -2.549281 | -0.496824 |
| h | 6.632606  | -1.364327 | -1.372517 |
| h | 6.633812  | 1.119514  | -1.570950 |
| h | 4.644504  | 2.431403  | -0.886529 |
| h | -0.076601 | -2.068956 | 1.752090  |
| h | -0.135438 | 2.252820  | 1.535926  |
| h | -1.156875 | 0.151199  | 2.805679  |
| h | 0.599593  | 0.173725  | 3.034228  |
| h | -0.759292 | -1.213843 | -0.757992 |
| h | -0.775897 | 1.136796  | -0.881682 |
| h | -2.872073 | 2.138381  | -0.166816 |
| h | -4.246328 | 1.233879  | 1.644470  |
| h | -2.689835 | 1.353426  | 2.447667  |
| h | -2.676390 | -1.109456 | 2.575786  |
| h | -4.232099 | -1.091605 | 1.763227  |

|   |           |           |           |
|---|-----------|-----------|-----------|
| h | -2.843128 | -2.162857 | 0.057932  |
| h | 1.705808  | -4.648474 | -0.168489 |
| h | 0.433219  | -3.397813 | -0.133244 |
| h | 1.617814  | -3.426000 | -1.472899 |
| h | 1.731159  | 4.621150  | -0.633432 |
| h | 0.529423  | 3.301443  | -0.671314 |
| h | 1.050241  | 4.006509  | 0.893321  |
| o | 2.409599  | -2.813369 | 0.393749  |
| o | 2.503291  | 2.824719  | -0.076502 |
| n | -5.704332 | -2.357718 | -1.424640 |
| n | -5.734114 | 2.146985  | -1.642685 |

S3 (TD-B3LYP/6-311G\*\*)

|   |           |           |           |
|---|-----------|-----------|-----------|
| c | 3.344480  | 0.125616  | -0.233953 |
| c | 2.749358  | 1.047273  | 0.819883  |
| c | 3.362107  | 0.400044  | 2.097160  |
| c | 3.415305  | -1.133067 | 1.744338  |
| c | 2.820878  | -1.197440 | 0.305900  |
| c | 1.288734  | -0.867234 | 0.247811  |
| c | 1.239450  | 0.682907  | 0.603354  |
| c | 0.244174  | -1.488334 | 1.245779  |
| c | -1.110731 | -0.962375 | 0.732678  |
| c | -1.130240 | 0.395647  | 1.052718  |
| c | 0.173212  | 0.742603  | 1.755161  |
| c | 0.374827  | -0.597758 | 2.515689  |
| c | -2.139286 | 1.255055  | 0.569669  |
| c | -3.288606 | 0.738014  | -0.113626 |
| c | -3.257380 | -0.638418 | -0.499375 |
| c | -2.145886 | -1.467326 | -0.091701 |
| c | -4.338909 | -1.184940 | -1.240490 |
| c | -5.459271 | -0.368269 | -1.553668 |
| c | -5.523144 | 0.940636  | -1.130114 |
| c | -4.446636 | 1.517295  | -0.395082 |
| c | -2.298573 | 3.666821  | -0.078721 |
| c | -1.347858 | -3.824286 | -0.140547 |
| c | 4.097875  | 0.395953  | -1.322699 |
| c | 4.473989  | 1.735592  | -1.650103 |
| c | 4.546006  | -0.648576 | -2.189706 |
| h | -4.561848 | 2.500313  | 0.035131  |
| h | -6.393686 | 1.548007  | -1.351449 |
| h | -6.274979 | -0.796256 | -2.126097 |
| h | -4.307750 | -2.217696 | -1.546331 |
| h | 0.162375  | 1.662008  | 2.335657  |
| h | 0.342256  | -2.558011 | 1.405930  |
| h | 1.318379  | -0.693434 | 3.039260  |
| h | -0.440343 | -0.784549 | 3.218588  |
| h | 0.880144  | 1.275224  | -0.242168 |
| h | 0.955956  | -1.049995 | -0.777936 |
| h | 3.101137  | -2.089776 | -0.252507 |
| h | 4.450216  | -1.486127 | 1.724218  |
| h | 2.872100  | -1.766076 | 2.446811  |

|   |           |           |           |
|---|-----------|-----------|-----------|
| h | 2.782041  | 0.626181  | 2.992285  |
| h | 4.370610  | 0.792034  | 2.256048  |
| h | 2.964941  | 2.109071  | 0.710296  |
| h | -3.043257 | 4.282103  | 0.425986  |
| h | -1.392246 | 4.247082  | -0.252359 |
| h | -2.703683 | 3.272151  | -1.007841 |
| h | -1.745624 | -4.711489 | -0.627553 |
| h | -0.331234 | -3.633653 | -0.491596 |
| h | -1.357022 | -3.958065 | 0.943717  |
| o | -1.904751 | 2.579247  | 0.830772  |
| o | -2.245968 | -2.753930 | -0.538433 |
| n | 4.769548  | 2.838416  | -1.900962 |
| n | 4.901027  | -1.519013 | -2.884600 |

#### S4. Gromacs-format topology of singlet FL

[ atoms ]

```

; nr  type resnr resid  atom  cgnr  charge  mass
  1  CH2  1  _2  CAM  1  0.350 14.0270
  2   C  1  _2  CAD  1 -0.350 12.0110
  3  CR1  1  _2  CAC  1 -0.050 12.0110
  4  HC  1  _2  HAC  1  0.100  1.0080
  5  CR1  1  _2  CAB  1 -0.050 12.0110
  6  HC  1  _2  HAB  1  0.100  1.0080
  7  CR1  1  _2  CAA  1 -0.050 12.0110
  8  HC  1  _2  HAA  1  0.100  1.0080
  9  CR1  1  _2  CAF  1 -0.050 12.0110
 10  HC  1  _2  HAF  1  0.100  1.0080
 11   C  1  _2  CAE  1 -0.025 12.0110
 12   C  1  _2  CAH  2 -0.025 12.0110
 13   C  1  _2  CAG  2 -0.350 12.0110
 14  CR1  1  _2  CAI  2 -0.050 12.0110
 15  HC  1  _2  HAI  2  0.100  1.0080
 16  CR1  1  _2  CAJ  2 -0.050 12.0110
 17  HC  1  _2  HAJ  2  0.100  1.0080
 18  CR1  1  _2  CAL  2 -0.050 12.0110
 19  HC  1  _2  HAL  2  0.100  1.0080
 20  CR1  1  _2  CAK  2 -0.050 12.0110
 21  HC  1  _2  HAK  2  0.100  1.0080

```

[ bonds ]

```

; ai aj fu  c0, c1, ...
  2  1  2  0.139 8660000.0
 13  1  2  0.139 8660000.0
  2  3  2  0.133 11800000.0
  2 11  2  0.133 11800000.0
  3  4  2  0.109 12300000.0
  3  5  2  0.139 10800000.0
  5  6  2  0.109 12300000.0

```

```
5 7 2 0.139 10800000.0
7 8 2 0.109 12300000.0
7 9 2 0.139 10800000.0
9 10 2 0.109 12300000.0
11 9 2 0.133 11800000.0
11 12 2 0.133 11800000.0
12 13 2 0.133 11800000.0
12 20 2 0.133 11800000.0
13 14 2 0.133 11800000.0
14 15 2 0.109 12300000.0
14 16 2 0.139 10800000.0
16 17 2 0.109 12300000.0
16 18 2 0.139 10800000.0
18 19 2 0.109 12300000.0
18 20 2 0.139 10800000.0
20 21 2 0.109 12300000.0
```

[ pairs ]

; ai aj fu c0, c1, ...

```
1 4 1
1 5 1
1 9 1
1 15 1
1 16 1
1 20 1
2 6 1
2 7 1
2 10 1
2 14 1
2 20 1
3 8 1
3 9 1
3 12 1
3 13 1
4 6 1
4 7 1
4 11 1
5 10 1
5 11 1
6 8 1
6 9 1
7 12 1
8 10 1
8 11 1
9 13 1
9 20 1
10 12 1
11 14 1
11 18 1
11 21 1
12 15 1
```

12 16 1  
12 19 1  
13 17 1  
13 18 1  
13 21 1  
14 19 1  
14 20 1  
15 17 1  
15 18 1  
16 21 1  
17 19 1  
17 20 1  
19 21 1

[ angles ]

; ai aj ak fu c0, c1, ...  
2 1 13 2 104.0 444.4  
1 2 3 2 132.0 760.0  
1 2 11 2 108.0 465.0  
3 2 11 2 120.0 560.0  
2 3 4 2 120.0 505.0  
2 3 5 2 120.0 505.0  
4 3 5 2 120.0 505.0  
3 5 6 2 120.0 505.0  
3 5 7 2 120.0 505.0  
6 5 7 2 120.0 505.0  
5 7 8 2 120.0 505.0  
5 7 9 2 120.0 505.0  
8 7 9 2 120.0 505.0  
7 9 10 2 120.0 505.0  
7 9 11 2 120.0 505.0  
10 9 11 2 120.0 505.0  
2 11 9 2 120.0 560.0  
2 11 12 2 108.0 465.0  
9 11 12 2 132.0 760.0  
11 12 13 2 108.0 465.0  
11 12 20 2 132.0 760.0  
13 12 20 2 120.0 560.0  
1 13 12 2 108.0 465.0  
1 13 14 2 132.0 760.0  
12 13 14 2 120.0 560.0  
13 14 15 2 120.0 505.0  
13 14 16 2 120.0 505.0  
15 14 16 2 120.0 505.0  
14 16 17 2 120.0 505.0  
14 16 18 2 120.0 505.0  
17 16 18 2 120.0 505.0  
16 18 19 2 120.0 505.0  
16 18 20 2 120.0 505.0  
19 18 20 2 120.0 505.0  
12 20 18 2 120.0 505.0  
12 20 21 2 120.0 505.0

18 20 21 2 120.0 505.0

[ dihedrals ]

```
; ai aj ak al fu c0, c1, m, ...  
 2 1 3 11 2 0.0 167.4  
 3 2 5 4 2 0.0 167.4  
 5 3 7 6 2 0.0 167.4  
 7 5 9 8 2 0.0 167.4  
 9 7 11 10 2 0.0 167.4  
11 12 9 2 2 0.0 167.4  
12 20 13 11 2 0.0 167.4  
13 1 14 12 2 0.0 167.4  
14 13 16 15 2 0.0 167.4  
16 14 18 17 2 0.0 167.4  
18 16 20 19 2 0.0 167.4  
20 12 18 21 2 0.0 167.4  
12 13 14 16 2 0.0 209.3  
13 14 16 18 2 0.0 209.3  
14 16 18 20 2 0.0 209.3  
16 18 20 12 2 0.0 209.3  
18 20 12 13 2 0.0 209.3  
20 12 13 14 2 0.0 209.3  
 2 3 5 7 2 0.0 209.3  
 3 5 7 9 2 0.0 209.3  
 5 7 9 11 2 0.0 209.3  
 7 9 11 2 2 0.0 209.3  
 9 11 2 3 2 0.0 209.3  
11 2 3 5 2 0.0 209.3  
13 1 2 3 1 0.0 2.1 6  
 2 1 13 14 1 0.0 2.1 6  
20 12 11 2 1 180.0 4.9 2
```

## S5. Gromos-format coordinates of singlet FL utilized in the MD simulation

```
1_2 C 1 1.166 0.742 2.200  
1_2 C 2 1.263 0.821 2.260  
1_2 C 3 1.334 0.795 2.370  
1_2 H 4 1.337 0.694 2.409  
1_2 C 5 1.436 0.883 2.407  
1_2 H 6 1.506 0.864 2.488  
1_2 C 7 1.445 0.996 2.327  
1_2 H 8 1.537 1.055 2.330  
1_2 C 9 1.371 1.014 2.211  
1_2 H 10 1.376 1.111 2.161  
1_2 C 11 1.281 0.923 2.176  
1_2 C 12 1.203 0.914 2.069  
1_2 C 13 1.141 0.796 2.074  
1_2 C 14 1.070 0.754 1.970  
1_2 H 15 1.004 0.667 1.973  
1_2 C 16 1.052 0.838 1.861
```

|     |   |    |       |       |       |
|-----|---|----|-------|-------|-------|
| 1_2 | H | 17 | 0.967 | 0.819 | 1.796 |
| 1_2 | C | 18 | 1.116 | 0.961 | 1.855 |
| 1_2 | H | 19 | 1.153 | 0.996 | 1.758 |
| 1_2 | C | 20 | 1.196 | 0.994 | 1.963 |
| 1_2 | H | 21 | 1.251 | 1.088 | 1.958 |

**S6. Spectrum of the eigenvalues as obtained from the diagonalization of the all-atom covariance matrix for singlet FL.**

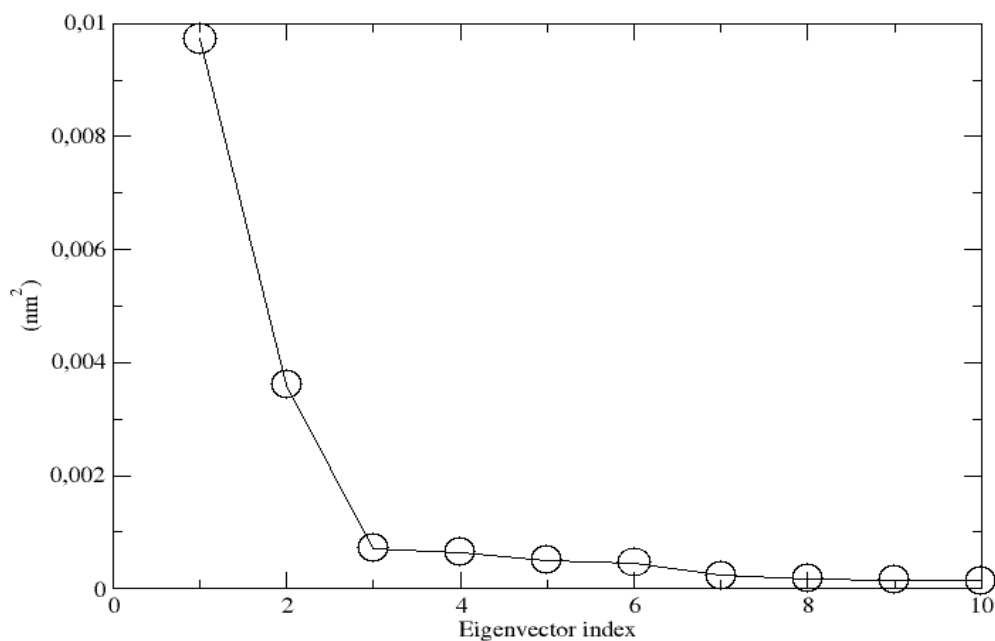

The two essential modes roughly correspond to the low-frequency out-of-plane normal modes of singlet carbene.

**S7. Geometries extracted by the essential plane and optimized in internal coordinates (by keeping frozen all the dihedral angles) at the B3LYP/6-311G\*\* level of theory**

```

REMARK   GENERATED BY TRJCONV
TITLE    bifenil in water t= 1.00000
REMARK   THIS IS A SIMULATION BOX
CRYST1  25.748  22.865  22.968  90.00  90.00  90.00 P 1      1
MODEL   1
ATOM    1  C  _2  1    1.139 -0.891  0.000  1.00  0.00
ATOM    2  C  _2  1    0.001 -1.827  0.000  1.00  0.00
ATOM    3  C  _2  1   -1.138 -0.893 -0.001  1.00  0.00
ATOM    4  C  _2  1   -0.743  0.476  0.000  1.00  0.00
ATOM    5  C  _2  1    0.742  0.477  0.000  1.00  0.00
ATOM    6  C  _2  1   -2.487 -1.229 -0.001  1.00  0.00
ATOM    7  H  _2  1   -2.774 -2.275 -0.001  1.00  0.00

```



ATOM 8 C \_2 1 -3.449 -0.205 0.000 1.00 0.00  
ATOM 9 H \_2 1 -4.506 -0.449 0.001 1.00 0.00  
ATOM 10 C \_2 1 -3.048 1.126 0.000 1.00 0.00  
ATOM 11 H \_2 1 -3.800 1.909 0.001 1.00 0.00  
ATOM 12 C \_2 1 -1.682 1.485 0.000 1.00 0.00  
ATOM 13 H \_2 1 -1.400 2.534 0.001 1.00 0.00  
ATOM 14 C \_2 1 1.680 1.488 0.000 1.00 0.00  
ATOM 15 H \_2 1 1.397 2.536 0.000 1.00 0.00  
ATOM 16 C \_2 1 3.046 1.130 0.000 1.00 0.00  
ATOM 17 H \_2 1 3.797 1.915 -0.001 1.00 0.00  
ATOM 18 C \_2 1 3.449 -0.201 0.000 1.00 0.00  
ATOM 19 H \_2 1 4.507 -0.443 0.000 1.00 0.00  
ATOM 20 C \_2 1 2.489 -1.225 0.000 1.00 0.00  
ATOM 21 H \_2 1 2.777 -2.272 0.001 1.00 0.00

TER

ENDMDL

REMARK GENERATED BY TRJCONV

TITLE bifetil in water t= 2.00000

REMARK THIS IS A SIMULATION BOX

CRYST1 25.748 22.865 22.968 90.00 90.00 90.00 P 1 1

MODEL 2

ATOM 1 C \_2 1 1.138 -0.893 -0.078 1.00 0.00  
ATOM 2 C \_2 1 0.002 -1.826 0.009 1.00 0.00  
ATOM 3 C \_2 1 -1.136 -0.893 0.067 1.00 0.00  
ATOM 4 C \_2 1 -0.742 0.475 0.018 1.00 0.00  
ATOM 5 C \_2 1 0.741 0.476 -0.030 1.00 0.00  
ATOM 6 C \_2 1 -2.485 -1.227 0.001 1.00 0.00  
ATOM 7 H \_2 1 -2.773 -2.274 -0.012 1.00 0.00  
ATOM 8 C \_2 1 -3.446 -0.205 -0.022 1.00 0.00  
ATOM 9 H \_2 1 -4.503 -0.450 -0.054 1.00 0.00  
ATOM 10 C \_2 1 -3.046 1.127 -0.001 1.00 0.00  
ATOM 11 H \_2 1 -3.797 1.910 -0.013 1.00 0.00  
ATOM 12 C \_2 1 -1.680 1.485 0.012 1.00 0.00  
ATOM 13 H \_2 1 -1.399 2.534 -0.009 1.00 0.00  
ATOM 14 C \_2 1 1.678 1.486 -0.010 1.00 0.00  
ATOM 15 H \_2 1 1.393 2.534 0.021 1.00 0.00  
ATOM 16 C \_2 1 3.044 1.130 0.006 1.00 0.00  
ATOM 17 H \_2 1 3.795 1.915 0.023 1.00 0.00  
ATOM 18 C \_2 1 3.447 -0.201 0.025 1.00 0.00  
ATOM 19 H \_2 1 4.504 -0.442 0.065 1.00 0.00  
ATOM 20 C \_2 1 2.487 -1.224 -0.002 1.00 0.00  
ATOM 21 H \_2 1 2.776 -2.270 0.014 1.00 0.00

TER

ENDMDL

REMARK GENERATED BY TRJCONV

TITLE bifetil in water t= 2.00000

REMARK THIS IS A SIMULATION BOX

CRYST1 25.748 22.865 22.968 90.00 90.00 90.00 P 1 1

MODEL 3

ATOM 1 C \_2 1 1.139 -0.892 -0.068 1.00 0.00  
ATOM 2 C \_2 1 0.001 -1.818 -0.156 1.00 0.00  
ATOM 3 C \_2 1 -1.138 -0.894 -0.045 1.00 0.00

ATOM 4 C \_2 1 -0.743 0.476 -0.075 1.00 0.00  
ATOM 5 C \_2 1 0.742 0.478 -0.088 1.00 0.00  
ATOM 6 C \_2 1 -2.481 -1.228 0.087 1.00 0.00  
ATOM 7 H \_2 1 -2.769 -2.274 0.135 1.00 0.00  
ATOM 8 C \_2 1 -3.440 -0.205 0.137 1.00 0.00  
ATOM 9 H \_2 1 -4.493 -0.447 0.238 1.00 0.00  
ATOM 10 C \_2 1 -3.045 1.125 0.031 1.00 0.00  
ATOM 11 H \_2 1 -3.798 1.908 0.037 1.00 0.00  
ATOM 12 C \_2 1 -1.684 1.482 -0.081 1.00 0.00  
ATOM 13 H \_2 1 -1.406 2.530 -0.154 1.00 0.00  
ATOM 14 C \_2 1 1.679 1.487 -0.022 1.00 0.00  
ATOM 15 H \_2 1 1.396 2.535 -0.034 1.00 0.00  
ATOM 16 C \_2 1 3.041 1.129 0.074 1.00 0.00  
ATOM 17 H \_2 1 3.791 1.912 0.124 1.00 0.00  
ATOM 18 C \_2 1 3.442 -0.202 0.115 1.00 0.00  
ATOM 19 H \_2 1 4.496 -0.446 0.200 1.00 0.00  
ATOM 20 C \_2 1 2.485 -1.227 0.038 1.00 0.00  
ATOM 21 H \_2 1 2.773 -2.273 0.058 1.00 0.00

TER

ENDMDL

REMARK GENERATED BY TRJCONV

TITLE bifenil in water t= 2.00000

REMARK THIS IS A SIMULATION BOX

CRYST1 25.748 22.865 22.968 90.00 90.00 90.00 P 1 1

MODEL 4

ATOM 1 C \_2 1 1.138 -0.892 -0.046 1.00 0.00  
ATOM 2 C \_2 1 0.001 -1.823 -0.099 1.00 0.00  
ATOM 3 C \_2 1 -1.138 -0.894 -0.024 1.00 0.00  
ATOM 4 C \_2 1 -0.743 0.476 -0.044 1.00 0.00  
ATOM 5 C \_2 1 0.742 0.478 -0.057 1.00 0.00  
ATOM 6 C \_2 1 -2.485 -1.228 0.064 1.00 0.00  
ATOM 7 H \_2 1 -2.772 -2.274 0.099 1.00 0.00  
ATOM 8 C \_2 1 -3.445 -0.204 0.090 1.00 0.00  
ATOM 9 H \_2 1 -4.500 -0.447 0.154 1.00 0.00  
ATOM 10 C \_2 1 -3.046 1.125 0.011 1.00 0.00  
ATOM 11 H \_2 1 -3.799 1.909 0.007 1.00 0.00  
ATOM 12 C \_2 1 -1.683 1.483 -0.061 1.00 0.00  
ATOM 13 H \_2 1 -1.402 2.532 -0.116 1.00 0.00  
ATOM 14 C \_2 1 1.679 1.487 -0.003 1.00 0.00  
ATOM 15 H \_2 1 1.397 2.536 -0.001 1.00 0.00  
ATOM 16 C \_2 1 3.044 1.129 0.054 1.00 0.00  
ATOM 17 H \_2 1 3.793 1.915 0.091 1.00 0.00  
ATOM 18 C \_2 1 3.446 -0.201 0.068 1.00 0.00  
ATOM 19 H \_2 1 4.503 -0.443 0.118 1.00 0.00  
ATOM 20 C \_2 1 2.488 -1.225 0.014 1.00 0.00  
ATOM 21 H \_2 1 2.776 -2.272 0.021 1.00 0.00

TER

ENDMDL

REMARK GENERATED BY TRJCONV

TITLE bifenil in water t= 2.00000

REMARK THIS IS A SIMULATION BOX

CRYST1 25.748 22.865 22.968 90.00 90.00 90.00 P 1 1

```

MODEL      5
ATOM      1 C  _2  1    1.139 -0.892 -0.028 1.00 0.00
ATOM      2 C  _2  1    0.001 -1.826 -0.089 1.00 0.00
ATOM      3 C  _2  1   -1.137 -0.894 -0.053 1.00 0.00
ATOM      4 C  _2  1   -0.743  0.476 -0.062 1.00 0.00
ATOM      5 C  _2  1    0.742  0.477 -0.050 1.00 0.00
ATOM      6 C  _2  1   -2.485 -1.228  0.012 1.00 0.00
ATOM      7 H  _2  1   -2.774 -2.275  0.021 1.00 0.00
ATOM      8 C  _2  1   -3.445 -0.205  0.068 1.00 0.00
ATOM      9 H  _2  1   -4.501 -0.449  0.120 1.00 0.00
ATOM     10 C  _2  1   -3.046  1.126  0.058 1.00 0.00
ATOM     11 H  _2  1   -3.796  1.909  0.102 1.00 0.00
ATOM     12 C  _2  1   -1.681  1.484 -0.001 1.00 0.00
ATOM     13 H  _2  1   -1.400  2.533  0.003 1.00 0.00
ATOM     14 C  _2  1    1.680  1.486 -0.061 1.00 0.00
ATOM     15 H  _2  1    1.398  2.534 -0.107 1.00 0.00
ATOM     16 C  _2  1    3.044  1.130  0.012 1.00 0.00
ATOM     17 H  _2  1    3.796  1.915  0.011 1.00 0.00
ATOM     18 C  _2  1    3.445 -0.199  0.091 1.00 0.00
ATOM     19 H  _2  1    4.501 -0.440  0.158 1.00 0.00
ATOM     20 C  _2  1    2.485 -1.224  0.067 1.00 0.00
ATOM     21 H  _2  1    2.775 -2.270  0.102 1.00 0.00
TER
ENDMDL
REMARK    GENERATED BY TRJCONV
TITLE     bifenil in water t= 2.00000
REMARK    THIS IS A SIMULATION BOX
CRYST1   25.748 22.865 22.968 90.00 90.00 90.00 P 1      1
MODEL      6
ATOM      1 C  _2  1    1.139 -0.893  0.028 1.00 0.00
ATOM      2 C  _2  1    0.001 -1.825  0.087 1.00 0.00
ATOM      3 C  _2  1   -1.138 -0.893  0.052 1.00 0.00
ATOM      4 C  _2  1   -0.743  0.476  0.064 1.00 0.00
ATOM      5 C  _2  1    0.742  0.477  0.050 1.00 0.00
ATOM      6 C  _2  1   -2.486 -1.228 -0.014 1.00 0.00
ATOM      7 H  _2  1   -2.773 -2.276 -0.023 1.00 0.00
ATOM      8 C  _2  1   -3.446 -0.205 -0.069 1.00 0.00
ATOM      9 H  _2  1   -4.502 -0.450 -0.120 1.00 0.00
ATOM     10 C  _2  1   -3.044  1.125 -0.058 1.00 0.00
ATOM     11 H  _2  1   -3.795  1.910 -0.104 1.00 0.00
ATOM     12 C  _2  1   -1.681  1.484  0.002 1.00 0.00
ATOM     13 H  _2  1   -1.399  2.533 -0.001 1.00 0.00
ATOM     14 C  _2  1    1.680  1.486  0.060 1.00 0.00
ATOM     15 H  _2  1    1.398  2.534  0.103 1.00 0.00
ATOM     16 C  _2  1    3.044  1.130 -0.013 1.00 0.00
ATOM     17 H  _2  1    3.795  1.914 -0.014 1.00 0.00
ATOM     18 C  _2  1    3.445 -0.199 -0.090 1.00 0.00
ATOM     19 H  _2  1    4.501 -0.440 -0.158 1.00 0.00
ATOM     20 C  _2  1    2.486 -1.224 -0.066 1.00 0.00
ATOM     21 H  _2  1    2.775 -2.270 -0.103 1.00 0.00
TER
ENDMDL

```

```

REMARK  GENERATED BY TRJCONV
TITLE    bifenil in water t= 2.00000
REMARK  THIS IS A SIMULATION BOX
CRYST1  25.748  22.865  22.968  90.00  90.00  90.00 P 1      1
MODEL    7
ATOM    1  C  _2  1    1.138 -0.891  0.053  1.00  0.00
ATOM    2  C  _2  1    0.001 -1.824  0.088  1.00  0.00
ATOM    3  C  _2  1   -1.138 -0.893  0.029  1.00  0.00
ATOM    4  C  _2  1   -0.743  0.475  0.052  1.00  0.00
ATOM    5  C  _2  1    0.742  0.477  0.064  1.00  0.00
ATOM    6  C  _2  1   -2.484 -1.228 -0.065  1.00  0.00
ATOM    7  H  _2  1   -2.771 -2.274 -0.101  1.00  0.00
ATOM    8  C  _2  1   -3.444 -0.205 -0.092  1.00  0.00
ATOM    9  H  _2  1   -4.500 -0.447 -0.161  1.00  0.00
ATOM   10  C  _2  1   -3.046  1.126 -0.016  1.00  0.00
ATOM   11  H  _2  1   -3.798  1.909 -0.020  1.00  0.00
ATOM   12  C  _2  1   -1.682  1.484  0.062  1.00  0.00
ATOM   13  H  _2  1   -1.403  2.532  0.110  1.00  0.00
ATOM   14  C  _2  1    1.679  1.487  0.003  1.00  0.00
ATOM   15  H  _2  1    1.395  2.535 -0.002  1.00  0.00
ATOM   16  C  _2  1    3.044  1.129 -0.058  1.00  0.00
ATOM   17  H  _2  1    3.793  1.914 -0.102  1.00  0.00
ATOM   18  C  _2  1    3.446 -0.201 -0.070  1.00  0.00
ATOM   19  H  _2  1    4.502 -0.444 -0.126  1.00  0.00
ATOM   20  C  _2  1    2.487 -1.225 -0.014  1.00  0.00
ATOM   21  H  _2  1    2.775 -2.272 -0.024  1.00  0.00
TER
ENDMDL

```

Projection of the electronic energy of the ground state singlet FL onto the essential plane as obtained using the above structures and carrying out a cubic spline. Note that because of the symmetry of the plane, only one half has been reported. The difference between the maximum (red) and the minimum (blue) is equal to 1.8 kJoule/mol .

Note also that the same procedure (calculation and spline) has been also adopted for the excited states (vertical) energies and electric dipole moment matrix (both expectation values and transition dipoles) to be used in the MD-PMM calculations (see text).

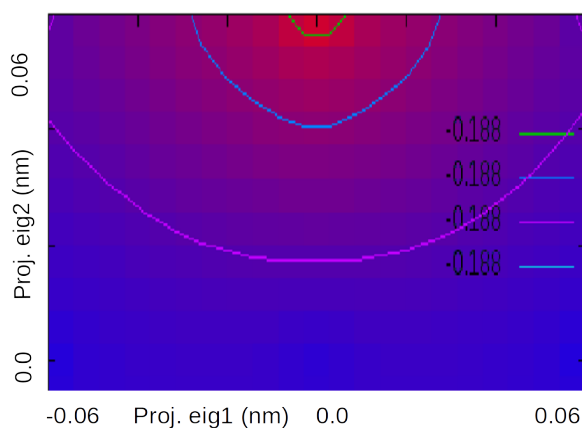

Supplement: c8ra03900c1.pdf [file c8ra03900c1.pdf]
